# Supplementary material for: Synthesis of guanidinium–sulfonimide ion pairs: towards novel ionic liquid crystals
Source: publisher site journal article supplement (doi:10.3762/bjoc.9.121), 2013-06-05
Supplement: Additional file 1 [file 1860-5397-9-121-S1.pdf]

## **Supporting Information**

**for**

### **Synthesis of guanidinium–sulfonimide ion pairs: towards novel ionic liquid crystals**

Martin Butschies, Manuel M. Neidhardt, Markus Mansueto, Sabine Laschat\*, Stefan Tussetschläger

Address: Institut für Organische Chemie, Universität Stuttgart, Pfaffenwalring 55, 70569 Stuttgart, Germany

Email: Sabine Laschat - [sabine.laschat@oc.uni-stuttgart.de](mailto:sabine.laschat@oc.uni-stuttgart.de)

\*Corresponding author

**DSC traces of compounds 2a,b, 3a and X-ray data of compound 3b**

DSC traces of compounds (2a,b) and (3a):

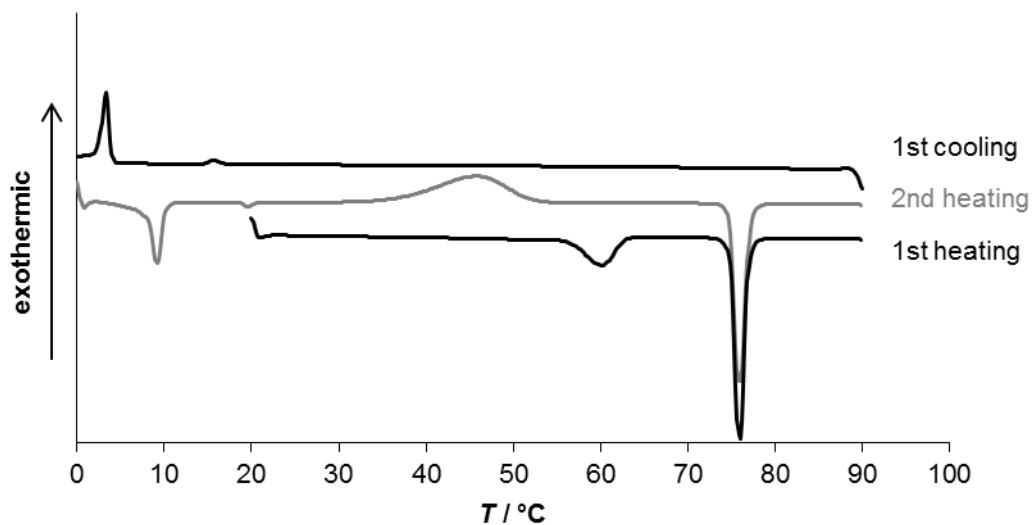

Figure S1: DSC trace of compound 3a (heating/cooling rate 10 K min<sup>-1</sup>).

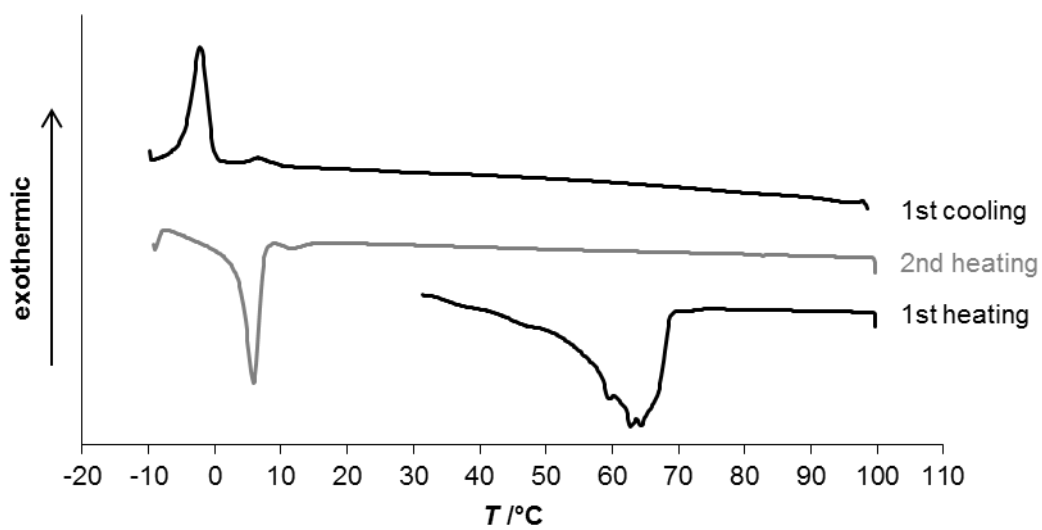

Figure S2: DSC trace of compound 2a (heating/cooling rate 10 K min<sup>-1</sup>).

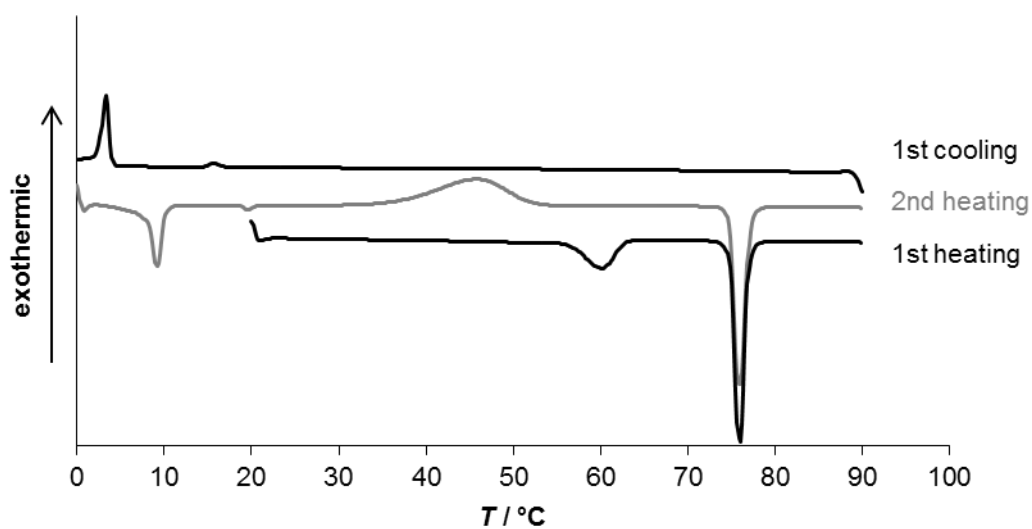

**Figure S3:** DSC trace of compound **2b** (heating/cooling rate  $10 \text{ K min}^{-1}$ ).

**X-ray data of compound (3b):**

**Table S1:** Temperature-dependent layer spacing of compound **3b**.

| Temperature     | Layer spacing        |
|-----------------|----------------------|
| $T/[\text{°C}]$ | $d_{001}/[\text{Å}]$ |
| 75.2            | 34.19                |
| 59.5            | 34.16                |
| 43.8            | 35.38                |
| WAXS 59.5       | 4.74 (halo)          |

**Table S2:** Water content of selected compounds.

| Comp.                           | Sample weight [mg] | Weight of CH <sub>2</sub> Cl <sub>2</sub> [mg] | Concentration (sample weight/ weight of CH <sub>2</sub> Cl <sub>2</sub> ) | Weight of the solution in [mg] | Detected mass of H <sub>2</sub> O in [μg] | % H <sub>2</sub> O    |
|---------------------------------|--------------------|------------------------------------------------|---------------------------------------------------------------------------|--------------------------------|-------------------------------------------|-----------------------|
| CH <sub>2</sub> Cl <sub>2</sub> | 1369.8             | –                                              | –                                                                         | 1369.8                         | 32.0 <sup>(a)</sup>                       | 2.34·10 <sup>-3</sup> |
| CH <sub>2</sub> Cl <sub>2</sub> | 1098.9             | –                                              | –                                                                         | 1098.9                         | 26.6 <sup>(a)</sup>                       | 2.42·10 <sup>-3</sup> |
| <b>7-I</b>                      | 51.25              | 2988.71                                        | 1.69·10 <sup>-2</sup>                                                     | 932.7                          | 42.2                                      | 0.13                  |
| <b>2b</b>                       | 47.38              | 2076.88                                        | 1.56·10 <sup>-2</sup>                                                     | 1656.0                         | 136.8                                     | 0.38                  |
| <b>3a</b>                       | 41.45              | 2606.73                                        | 1.37·10 <sup>-2</sup>                                                     | 2012.4                         | 145.3                                     | 0.36                  |

(a) Ø = 23.8 μg H<sub>2</sub>O in 1 g abs. CH<sub>2</sub>Cl<sub>2</sub>
